# Supplementary material
Source: HighWire-hosted journal article supplement (https://tsaco.bmj.com/content/9/1/e001332)
Supplement: inline-supplementary-material-2 [file inline-supplementary-material-2.pdf]

**Supplemental Table 4.** Individual Case Numbers and Deaths Per SOST Surgeon

| Surgeon | Cases | Mortalities |
|---------|-------|-------------|
| A       | 2     | 0 (0)       |
| B       | 3     | 0 (0)       |
| C       | 8     | 0 (0)       |
| D       | 12    | 1 (8)       |
| E       | 10    | 1 (10)      |
| F       | 8     | 0 (0)       |

\*Data displayed as number (%)

**Supplemental Table 4:** Individual case numbers and deaths per SOST Surgeon
